# Supplementary material for: Chromosome-Level Genome Assembly of Protosalanx chinensis and Response to Air Exposure Stress
Source: MDPI journal article supplement (doi:10.3390/biology12091266), 2023-09-21
Supplement: s1 [file s1]

# Chromosome-level genome assembly of *Protosalanx chinensis* and response to air exposure stress

Supplementary:

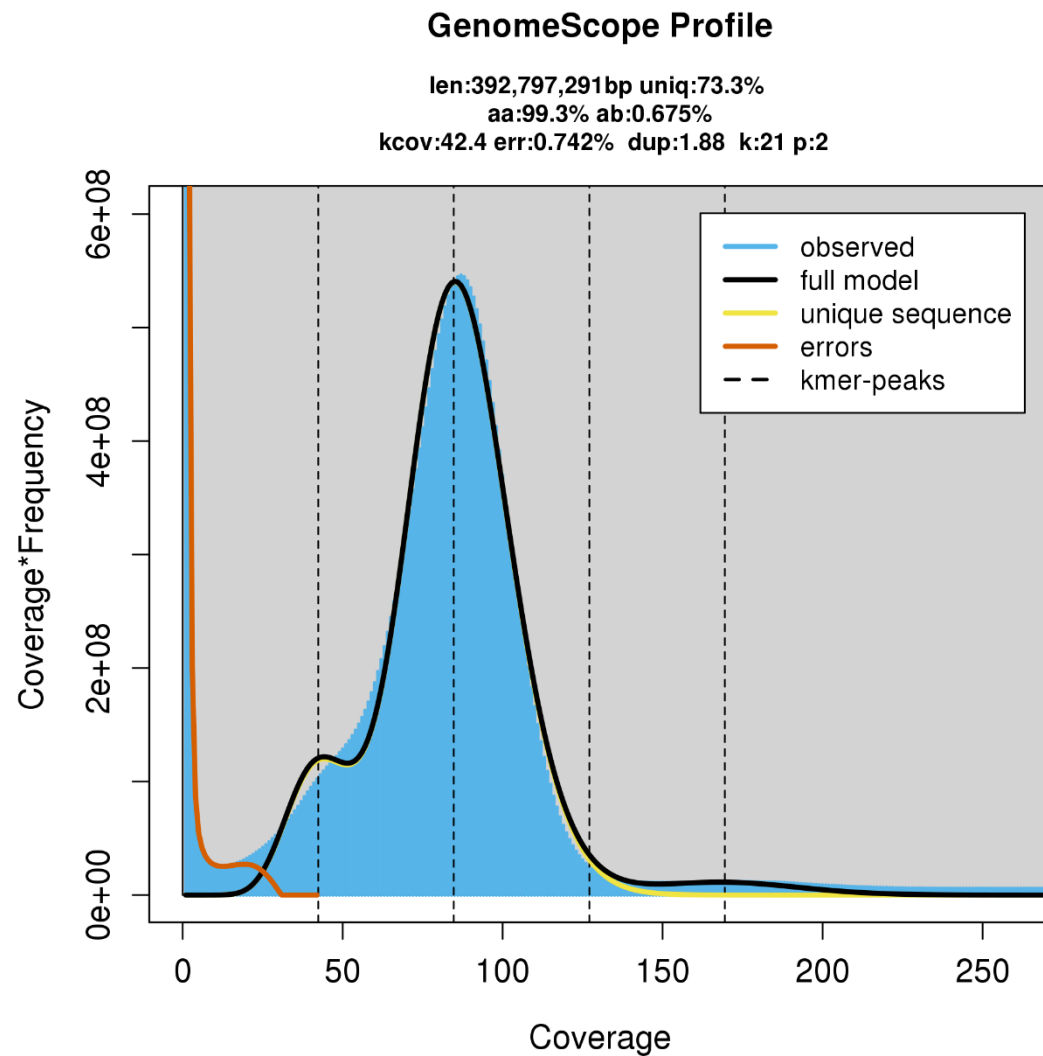

**Figure S1.** 21-mers analysis for estimating the genome size of *P. chinensis*.

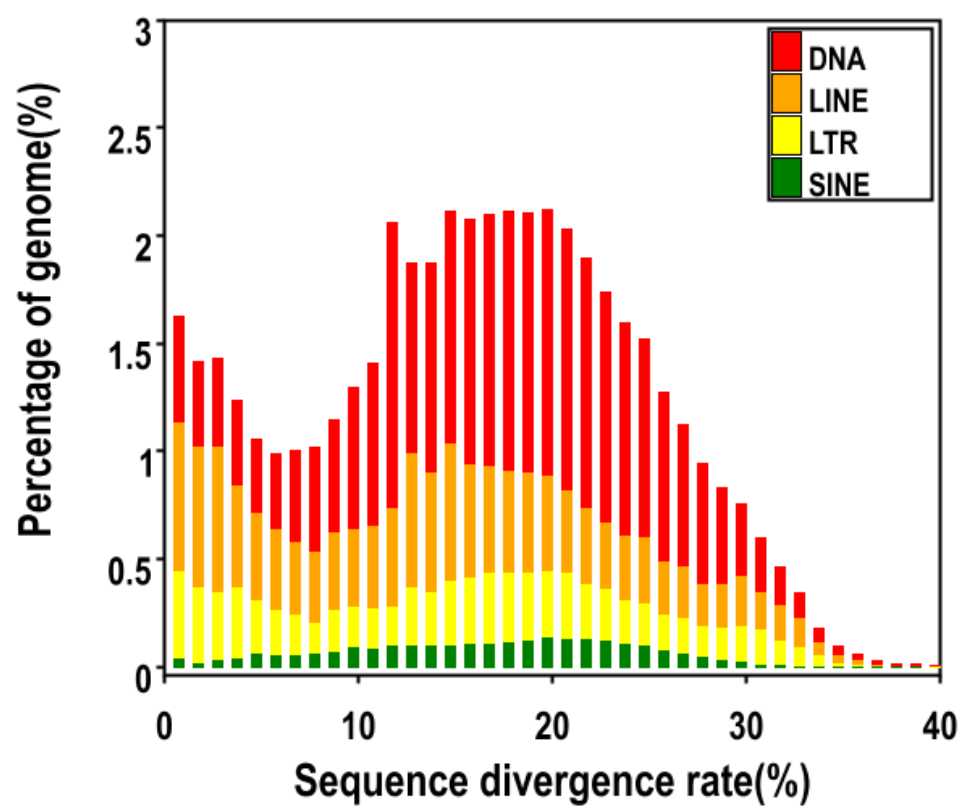

Figure S2. Divergence distribution of repetitive elements in *P. chinensis* genome.

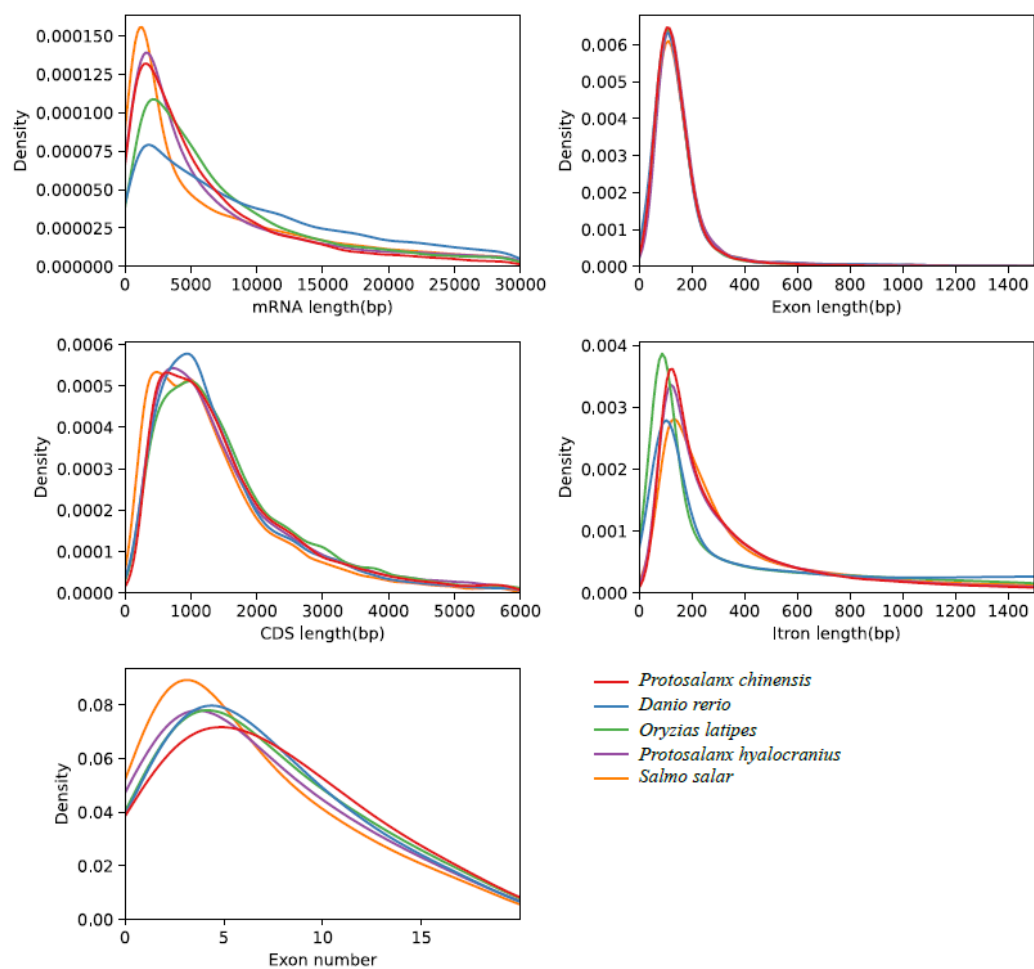

**Figure S3.** Distribution of gene, coding sequence, exon, and intron lengths, and exon number in *P. chinensis* and other four genomes.

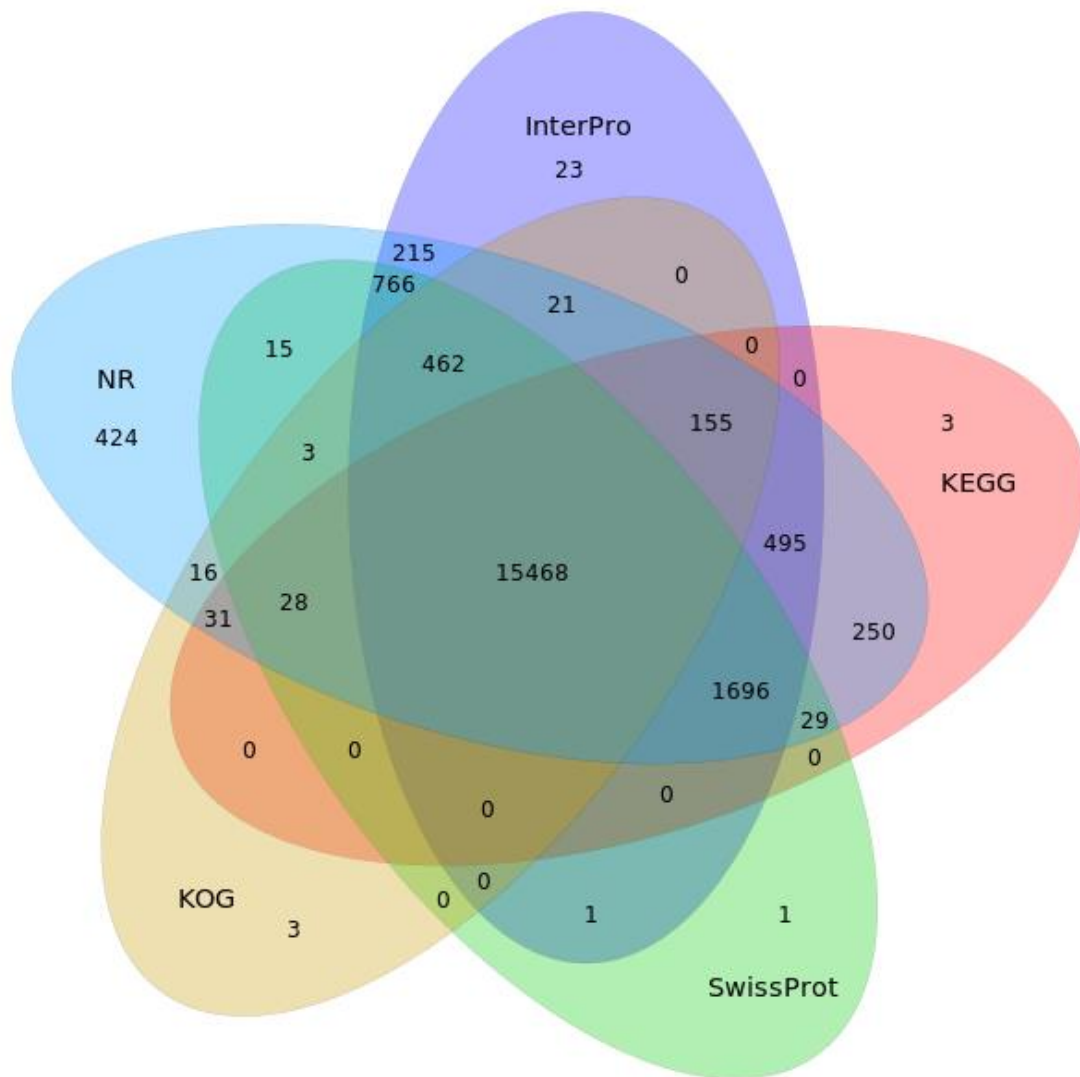

**Figure S4.** Gene function annotation results in the five databases of NR, InterPro, KEGG, SwissProt and KOG statistics Venn diagram.

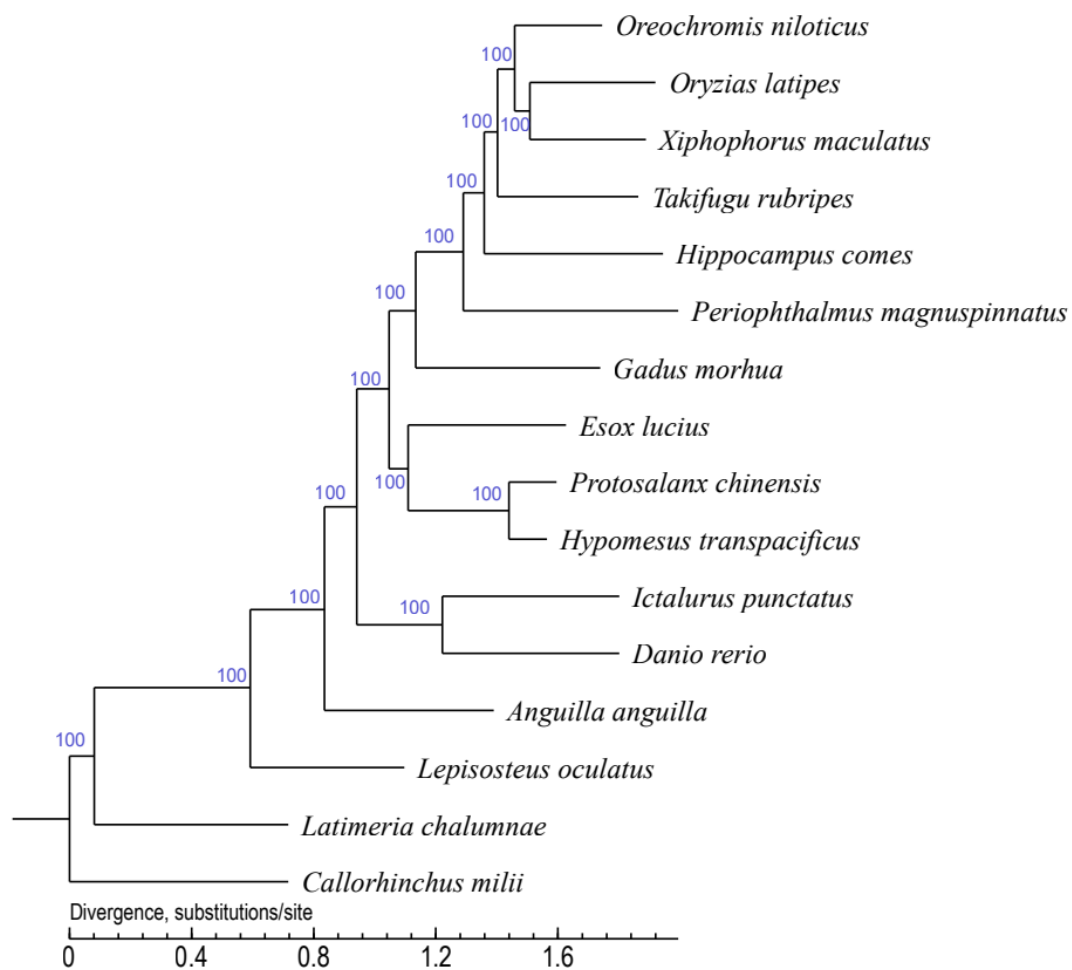

**Figure S5.** Phylogenetic tree of 16 species based on maximum-likelihood using 2 152 single-copy orthologs.

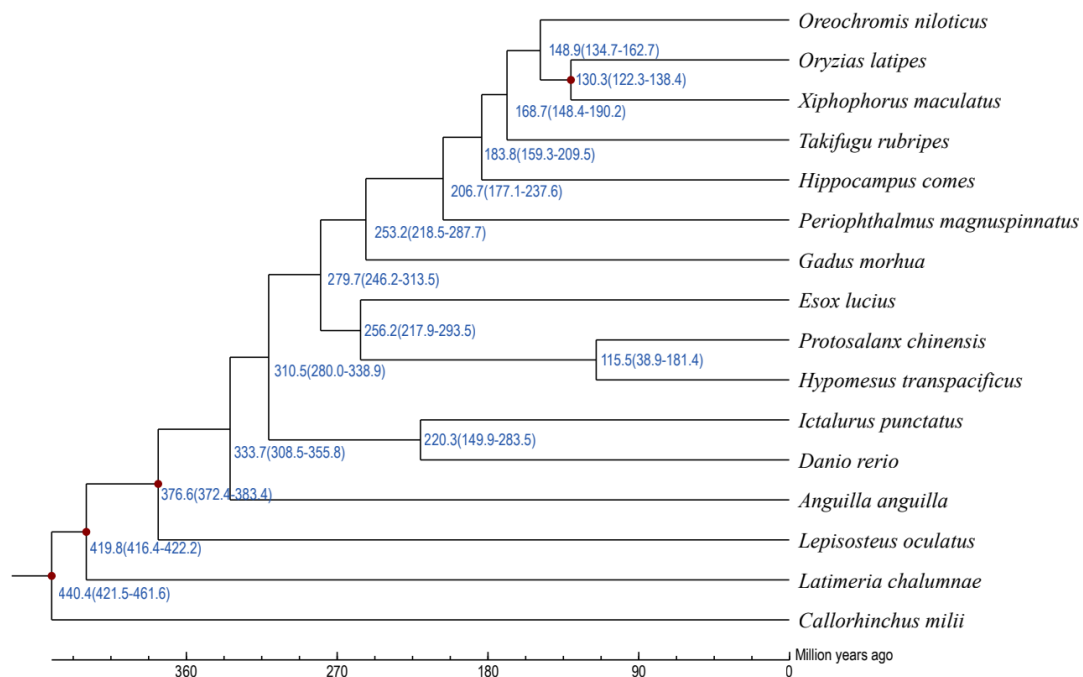

**Figure S6.** Estimation of divergence times of 16 species.

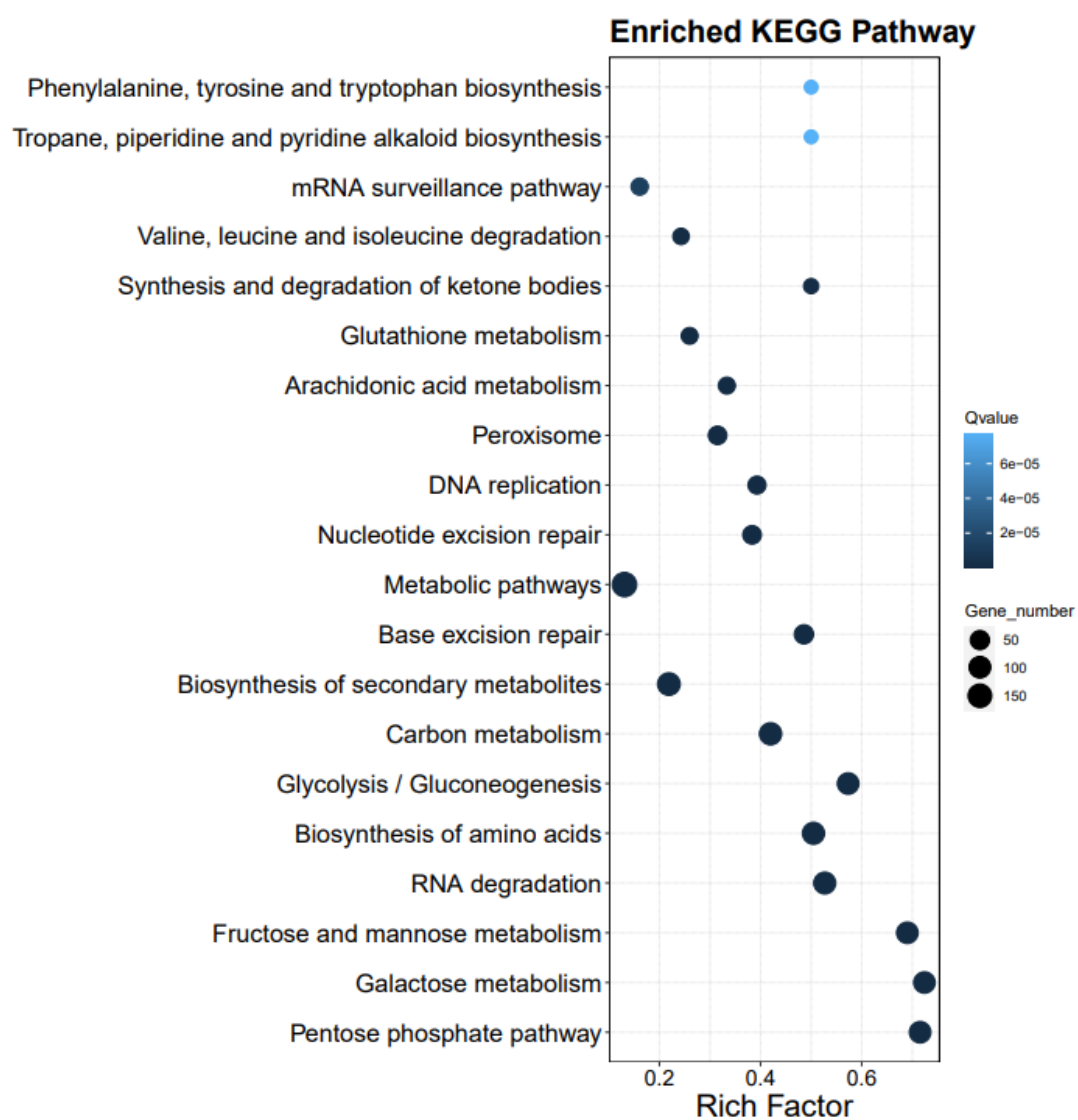

**Figure S7.** Functional enrichment results of expansion gene families in *P. chinensis* genome, Terms with  $P < 0.01$  was selected.

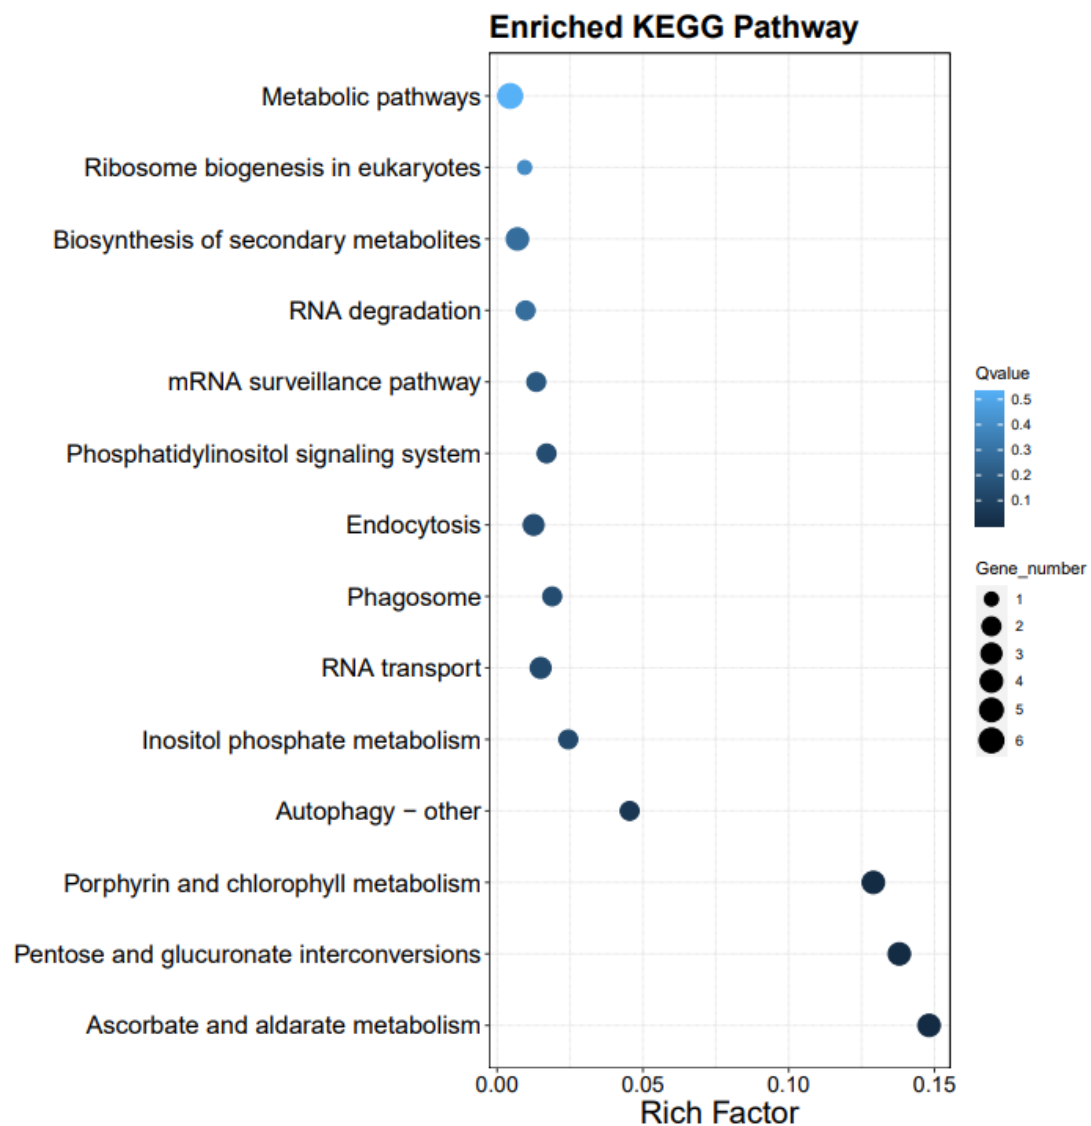

**Figure S8.** Functional enrichment results of extraction gene families in *P. chinensis* genome, Terms with  $P < 0.01$  was selected.

**Table S1** Sequencing data used for the genome *P. chinensis* assembly.

| Type   | Sample | Platform                | Bases / Gb | Reads Count | Max length / bp | Mean length / bp | N50 / bp |
|--------|--------|-------------------------|------------|-------------|-----------------|------------------|----------|
| CCS    | muscle | PacBio Sequel II (HiFi) | 25         | 1,350,737   | 37,330          | 18,271           | 18,205   |
| Hi-C   | muscle | DNBSEQ                  | 107        | 356,700,000 | 150             | 150              | 150      |
| WGS    | muscle | DNBSEQ                  | 45         | 150,066,667 | 150             | 150              | 150      |
| RNAseq | muscle | DNBSEQ                  | 96.4       | 321,333,333 | 150             | 150              | 150      |

Note: Clean data.

**Table S2** The information of *P. chinensis* genome survey analysis.

| Kmer | Kmer number    | Used Base<br>/Gb | Genome<br>Size/Mb | Heter<br>Rate/% | Repeat<br>rate/% | Error Rate | Depth/X |
|------|----------------|------------------|-------------------|-----------------|------------------|------------|---------|
| 21   | 38,889,443,073 | 46.55            | 392.80            | 0.68            | 26.70            | 0.74       | 119.36  |

**Table S3** The statistics of length and number for the de novo assembled Protosalanx genomes.

|                 | <i>Protosalanx chinensis</i> * |        |                |        | <i>Protosalanx chinensis</i> <sup>#1</sup> |        |                |        | <i>Protosalanx hyalocranius</i> <sup>#2</sup> |        |                |        |
|-----------------|--------------------------------|--------|----------------|--------|--------------------------------------------|--------|----------------|--------|-----------------------------------------------|--------|----------------|--------|
|                 | scaffold                       |        | contig         |        | scaffold                                   |        | contig         |        | scaffold                                      |        | contig         |        |
|                 | Length<br>(Mb)                 | number | Length<br>(Mb) | number | Length<br>(Mb)                             | number | Length<br>(Mb) | number | Length<br>(Mb)                                | number | Length<br>(Mb) | number |
| <b>Total</b>    |                                |        |                |        |                                            |        |                |        |                                               |        |                |        |
| <b>length</b>   | 379.47                         |        | 378.20         |        | 466.69                                     |        | 444.87         |        | 536.56                                        |        | 414.85         |        |
| <b>Max</b>      |                                |        |                |        |                                            |        |                |        |                                               |        |                |        |
| <b>length</b>   | 20.42                          |        | 6.23           |        | 44.19                                      |        | 2.14           |        | 5.40                                          |        | 0.37           |        |
| <b>number</b>   |                                |        |                |        |                                            |        |                |        |                                               |        |                |        |
| <b>r&gt;=20</b> |                                |        |                |        |                                            |        |                |        |                                               |        |                |        |
| <b>00bp</b>     |                                | 182    |                | 2,083  |                                            | 618    |                | 11,196 |                                               | 681    |                | 19,755 |
| <b>N50</b>      | 14.52                          | 12     | 0.53           | 138    | 5.189                                      | 23     | 0.10           | 876    | 1.16                                          | 126    | 0.02           | 5,716  |
| <b>N60</b>      | 14.37                          | 14     | 0.32           | 227    | 4.03                                       | 33     | 0.06           | 1,443  | 0.89                                          | 179    | 0.01           | 8,488  |
| <b>N70</b>      | 12.14                          | 17     | 0.20           | 377    | 2.57                                       | 48     | 0.03           | 2,424  | 0.72                                          | 246    | 0.009          | 12,448 |
| <b>N80</b>      | 10.38                          | 21     | 0.12           | 629    | 1.63                                       | 71     | 0.02           | 4,260  | 0.53                                          | 334    | 0.005          | 18,481 |
| <b>N90</b>      | 8.60                           | 25     | 0.06           | 1,090  | 0.79                                       | 110    | 0.01           | 7,942  | 0.40                                          | 451    | 0.003          | 28,932 |

Note: “\*” indicated this study. #1 indicated data from NCBI (GCA\_010882115.1). #2 indicated data from GigaDB.

**Table S4** Statistics of chromosomal length of *P. chinensis* genome

| <b>ID</b> | <b>length / bp</b> | <b>N content / %</b> | <b>GC content / %</b> | <b>gap number</b> |
|-----------|--------------------|----------------------|-----------------------|-------------------|
| Chr01     | 20,420,276         | 0.12                 | 45.23                 | 51                |
| Chr02     | 18,896,921         | 0.19                 | 45.77                 | 72                |
| Chr03     | 18,499,308         | 0.21                 | 45.71                 | 76                |
| Chr04     | 18,387,637         | 0.21                 | 45.66                 | 77                |
| Chr05     | 18,113,639         | 0.22                 | 46.00                 | 78                |
| Chr06     | 16,854,175         | 0.25                 | 45.69                 | 83                |
| Chr07     | 15,801,697         | 0.20                 | 45.77                 | 62                |
| Chr08     | 15,704,969         | 0.18                 | 46.32                 | 56                |
| Chr09     | 15,250,643         | 0.29                 | 46.18                 | 88                |
| Chr10     | 14,596,046         | 0.22                 | 46.46                 | 65                |
| Chr11     | 14,559,807         | 0.25                 | 46.00                 | 73                |
| Chr12     | 14,524,669         | 0.20                 | 45.76                 | 58                |
| Chr13     | 14,516,431         | 0.28                 | 46.71                 | 81                |
| Chr14     | 14,368,868         | 0.22                 | 45.92                 | 62                |
| Chr15     | 13,763,165         | 0.25                 | 46.24                 | 69                |
| Chr16     | 12,769,249         | 0.29                 | 45.96                 | 74                |
| Chr17     | 12,140,554         | 0.29                 | 46.49                 | 70                |
| Chr18     | 11,942,187         | 0.26                 | 46.49                 | 63                |
| Chr19     | 11,457,059         | 0.30                 | 46.54                 | 69                |
| Chr20     | 10,973,078         | 0.27                 | 45.97                 | 60                |
| Chr21     | 10,382,235         | 0.35                 | 46.38                 | 72                |
| Chr22     | 9,567,638          | 0.34                 | 46.47                 | 65                |
| Chr23     | 8,865,516          | 0.34                 | 45.35                 | 61                |
| Chr24     | 8,622,590          | 0.44                 | 46.79                 | 76                |
| Chr25     | 8,599,918          | 0.33                 | 46.09                 | 56                |
| Chr26     | 8,044,071          | 0.38                 | 45.89                 | 61                |
| Chr27     | 7,821,795          | 0.45                 | 46.56                 | 70                |
| Chr28     | 7,775,152          | 0.34                 | 46.92                 | 53                |
| UnChr     | 7,684              | 0.00                 | 49.89                 | 154*              |

**Table S5** Repetitive sequences in *P. chinensis* genome.

| Type         | Repeat Length(bp) | % of genome |
|--------------|-------------------|-------------|
| Trf          | 49,646,207        | 13.08       |
| Repeatmasker | 55,900,805        | 14.73       |
| Proteinmask  | 13,034,864        | 3.44        |
| De novo      | 106,663,727       | 28.11       |
| Total        | 134,135,271       | 35.35       |

**Table S6** Transposable elements in *P. chinensis* genome.

| Type    | Rebase<br>Length | TEs<br>(Bp) | TE<br>%    | protiens<br>in | De<br>genome | novo<br>Length | Combined<br>(Bp) | TEs<br>% |
|---------|------------------|-------------|------------|----------------|--------------|----------------|------------------|----------|
| DNA     | 37,198,648       | 9.80        | 2,152,173  | 0.57           | 45,396,534   | 11.96          | 62,315,343       | 16.42    |
| LINE    | 14,962,624       | 3.94        | 8,259,127  | 2.18           | 38,685,479   | 10.19          | 44,528,459       | 11.73    |
| SINE    | 2,236,495        | 0.59        | 0          | 0.00           | 7,458,771    | 1.97           | 8,955,619        | 2.36     |
| LTR     | 9,678,765        | 2.55        | 2,630,607  | 0.69           | 24,310,203   | 6.41           | 31,005,092       | 8.17     |
| Other   | 4,367            | 0.0012      | 207        | 0.0001         | 0            | 0.00           | 4,574            | 0.0012   |
| Unknown | 0                | 0.00        | 0          | 0.00           | 2,854,747    | 0.75           | 2,854,747        | 0.75     |
| Total   | 55,900,805       | 14.73       | 13,034,864 | 3.44           | 101,482,109  | 26.74          | 110,718,260      | 29.18    |

**Table S7** Gene predictions in *P. chinensis* genome.

|                | Gene set               | Number | Average<br>gene<br>length(bp) | Average<br>CDS<br>length(bp) | Average<br>exon per<br>gene | Average<br>exon<br>length(bp) | Average<br>intron<br>length(bp) |
|----------------|------------------------|--------|-------------------------------|------------------------------|-----------------------------|-------------------------------|---------------------------------|
| <i>De novo</i> | <i>Augustus</i>        | 32,797 | 5,303                         | 1,436                        | 7                           | 205                           | 645                             |
|                | <i>Snap</i>            | 53,282 | 6,210                         | 1,178                        | 6                           | 185                           | 935                             |
|                | <i>D. rerio</i>        | 19,501 | 7,014                         | 1,604                        | 9                           | 174                           | 658                             |
| Homolog        | <i>O. latipes</i>      | 20,409 | 6,813                         | 1,605                        | 9                           | 185                           | 678                             |
|                | <i>P. hyalocranius</i> | 18,912 | 7,561                         | 1,566                        | 8                           | 195                           | 854                             |
|                | <i>S. salar</i>        | 25,318 | 6,357                         | 1,512                        | 8                           | 184                           | 672                             |
|                | Transcript             | 55,612 | 8,985                         | 1,296                        | 7                           | 186                           | 1,286                           |
|                | Final                  | 21,074 | 8,017                         | 1,695                        | 10                          | 175                           | 727                             |

**Table S8** The evidence supporting the gene models of *P. chinese* genome

|                  | <b>&gt;=30% overlap</b> |                  | <b>&gt;=50% overlap</b> |                  | <b>&gt;=80% overlap</b> |                  |
|------------------|-------------------------|------------------|-------------------------|------------------|-------------------------|------------------|
|                  | <b>No.</b>              | <b>Ratio (%)</b> | <b>No.</b>              | <b>Ratio (%)</b> | <b>No.</b>              | <b>Ratio (%)</b> |
| <b>R(single)</b> | 1,101                   | 5.22             | 1,239                   | 5.88             | 1,773                   | 8.41             |
| <b>H(single)</b> | 6                       | 0.03             | 14                      | 0.07             | 187                     | 0.89             |
| <b>H(more)</b>   | 5                       | 0.02             | 22                      | 0.1              | 249                     | 1.18             |
| <b>P(single)</b> | 6                       | 0.03             | 47                      | 0.22             | 376                     | 1.78             |
| <b>P(more)</b>   | 70                      | 0.33             | 229                     | 1.09             | 580                     | 2.75             |
| <b>HR</b>        | 629                     | 2.98             | 915                     | 4.34             | 2,346                   | 11.13            |
| <b>PR</b>        | 1,577                   | 7.48             | 1,517                   | 7.2              | 1,279                   | 6.07             |
| <b>PH</b>        | 2,127                   | 10.09            | 2,677                   | 12.7             | 3,406                   | 16.16            |
| <b>PHR</b>       | 15,553                  | 73.8             | 14,414                  | 68.4             | 10,807                  | 51.28            |
| <b>Total</b>     | 21,074                  | 100              | 21,074                  | 100              | 21,003                  | 99.66            |

Note: “P” refers to evidences from *de novo* prediction; “H” refers to evidences from homolog prediction; “R” refers to evidences from transcriptomic prediction; “PH” refers to evidences both from *de novo* prediction and homolog prediction; “PR” refers to evidences both from transcriptomic prediction and *de novo* prediction; “HR” refers to evidences both from transcriptomic prediction and homolog prediction; “PHR” refers to evidences from transcriptomic prediction, homolog prediction and *de novo* prediction ; “single” refers to one type of evidence; “more” refers to more than one evidence. “>=30% overlap” refers to 30% of the query sequences are aligned onto target sequences; “>=50% overlap” refers to 50% of the query sequences are aligned onto target sequences; “>=80% overlap” refers to 80% of the query sequences are aligned onto target sequences;

**Table S9** BUSCO analysis result of *P. chinensis* genome

| Type                                   | Genome |                | Protein |                |
|----------------------------------------|--------|----------------|---------|----------------|
|                                        | Number | Percentage (%) | Number  | Percentage (%) |
| <b>Complete BUSCOs</b>                 | 3,208  | 88.10          | 3,035   | 83.40          |
| <b>Complete and single-copy BUSCOs</b> | 3,109  | 85.40          | 2,959   | 81.30          |
| <b>Complete and duplicated BUSCOs</b>  | 99     | 2.70           | 76      | 2.10           |
| <b>Fragmented BUSCOs</b>               | 71     | 2.00           | 94      | 2.60           |
| <b>Missing BUSCOs</b>                  | 361    | 9.90           | 511     | 14.00          |
| <b>Total BUSCO groups searched</b>     | 3,640  | 100.00         | 3,640   | 100.00         |

Note: actinopterygii\_odb10 database

**Table S10** Functional annotations of *P. chinensis* genes.

|                     | <b>Total</b> | <b>Nr</b> | <b>Swissprot</b> | <b>KEGG</b> | <b>KOG</b> | <b>TrEMBL</b> | <b>Interpro</b> | <b>GO</b> | <b>Overall</b> |
|---------------------|--------------|-----------|------------------|-------------|------------|---------------|-----------------|-----------|----------------|
| <b>Number</b>       | 21,074       | 20,074    | 18,469           | 18,155      | 16,187     | 20,090        | 19,302          | 14,470    | 20,140         |
| <b>Percentage/%</b> | 100          | 95.25     | 87.64            | 86.15       | 76.81      | 95.33         | 91.59           | 68.66     | 95.57          |

**Table S11** Gene family clustered.

| <b>Species</b>        | <b>Number of genes</b> | <b>Number of genes in orthogroups</b> | <b>Number of unassigned genes</b> | <b>Number of species-specific orthogroups</b> | <b>Number of genes in species-specific orthogroups</b> |
|-----------------------|------------------------|---------------------------------------|-----------------------------------|-----------------------------------------------|--------------------------------------------------------|
| <i>Anguilla</i>       |                        |                                       |                                   |                                               |                                                        |
| <i>anguilla</i>       | 25,827                 | 25,127                                | 700                               | 91                                            | 595                                                    |
| <i>Callorhinch</i>    |                        |                                       |                                   |                                               |                                                        |
| <i>us milii</i>       | 16,762                 | 16,058                                | 704                               | 91                                            | 348                                                    |
| <i>Danio rerio</i>    | 25,534                 | 24,762                                | 772                               | 172                                           | 1,466                                                  |
| <i>Esox lucius</i>    | 24,524                 | 23,887                                | 637                               | 101                                           | 665                                                    |
| <i>Gadus</i>          |                        |                                       |                                   |                                               |                                                        |
| <i>morhua</i>         | 23,169                 | 22,581                                | 588                               | 104                                           | 507                                                    |
| <i>Hippocampus</i>    |                        |                                       |                                   |                                               |                                                        |
| <i>s comes</i>        | 20,772                 | 20,352                                | 420                               | 74                                            | 249                                                    |
| <i>Hypomesus</i>      |                        |                                       |                                   |                                               |                                                        |
| <i>transpacificus</i> | 21,614                 | 21,176                                | 438                               | 37                                            | 156                                                    |
| <i>Ictalurus</i>      |                        |                                       |                                   |                                               |                                                        |
| <i>punctatus</i>      | 23,205                 | 22,602                                | 603                               | 103                                           | 417                                                    |
| <i>Latimeria</i>      |                        |                                       |                                   |                                               |                                                        |
| <i>chalumnae</i>      | 18,904                 | 17,763                                | 1,141                             | 108                                           | 616                                                    |
| <i>Lepisosteus</i>    |                        |                                       |                                   |                                               |                                                        |
| <i>oculatus</i>       | 18,514                 | 17,946                                | 568                               | 50                                            | 224                                                    |
| <i>Oryzias</i>        |                        |                                       |                                   |                                               |                                                        |
| <i>latipes</i>        | 21,972                 | 21,667                                | 305                               | 74                                            | 476                                                    |
| <i>Oreochromis</i>    |                        |                                       |                                   |                                               |                                                        |
| <i>s niloticus</i>    | 29,385                 | 28,884                                | 501                               | 220                                           | 1,257                                                  |
| <i>Protosalanx</i>    |                        |                                       |                                   |                                               |                                                        |
| <i>chinensis</i>      | 21,074                 | 19,376                                | 1,698                             | 81                                            | 436                                                    |
| <i>Periophthalmus</i> |                        |                                       |                                   |                                               |                                                        |
| <i>magnuspinnatus</i> | 21,032                 | 20,679                                | 353                               | 52                                            | 241                                                    |
| <i>Takifugu</i>       |                        |                                       |                                   |                                               |                                                        |
| <i>rubripes</i>       | 21,946                 | 21,614                                | 332                               | 88                                            | 417                                                    |
| <i>Xiphophorus</i>    |                        |                                       |                                   |                                               |                                                        |
| <i>maculatus</i>      | 23,150                 | 22,833                                | 317                               | 54                                            | 387                                                    |

**Table S12** The statics of Syntenic Blocks.

| <b>SpecieA vs<br/>SpecieB</b>                                | <b>Of<br/>Synteni<br/>c Blocks</b> | <b>Average Syntenic<br/>Gene Pairs Per<br/>Block</b> | <b>Of<br/>Syntenic<br/>Gene<br/>Pairs</b> | <b>Mean Block<br/>Length of<br/>SpecieA</b> | <b>Mean Block<br/>Length of<br/>SpecieB</b> |
|--------------------------------------------------------------|------------------------------------|------------------------------------------------------|-------------------------------------------|---------------------------------------------|---------------------------------------------|
| <i>P. chinensis</i><br><i>vs E. lucius</i>                   | 187                                | 36                                                   | 6,725                                     | 1,306,983                                   | 2,701,623                                   |
| <i>P. chinensis</i><br><i>vs P.</i><br><i>transpacificus</i> | 194                                | 57                                                   | 11,012                                    | 1,774,393                                   | 1,936,891                                   |

Note: at least 20 genes required to call a collinear block between inter-species.

**Table S13** Top 20 pathway resulted from KEGG. KEGG enrichment of the markable expanded gene family in *P. chinensis* genome.

| Pathway                                                | Gene_number | Background_gene_number | RichFactor | Qvalue   |
|--------------------------------------------------------|-------------|------------------------|------------|----------|
| Pentose phosphate pathway                              | 98          | 137                    | 0.72       | 1.71E-89 |
| Galactose metabolism                                   | 97          | 134                    | 0.72       | 1.71E-89 |
| Fructose and mannose metabolism                        | 98          | 142                    | 0.69       | 2.92E-87 |
| RNA degradation                                        | 108         | 205                    | 0.53       | 3.71E-78 |
| Biosynthesis of amino acids                            | 111         | 220                    | 0.50       | 9.10E-78 |
| Glycolysis / Gluconeogenesis                           | 98          | 171                    | 0.57       | 8.65E-76 |
| Carbon metabolism                                      | 115         | 274                    | 0.42       | 1.58E-69 |
| Biosynthesis of secondary metabolites                  | 126         | 576                    | 0.22       | 5.43E-40 |
| Base excision repair                                   | 51          | 105                    | 0.49       | 1.22E-34 |
| Metabolic pathways                                     | 176         | 1344                   | 0.13       | 8.21E-26 |
| Nucleotide excision repair                             | 41          | 107                    | 0.38       | 4.82E-23 |
| DNA replication                                        | 33          | 84                     | 0.39       | 4.35E-19 |
| Peroxisome                                             | 40          | 127                    | 0.31       | 6.07E-19 |
| Arachidonic acid metabolism                            | 22          | 66                     | 0.33       | 2.65E-11 |
| Glutathione metabolism                                 | 20          | 77                     | 0.26       | 3.17E-08 |
| Synthesis and degradation of ketone bodies             | 9           | 18                     | 0.50       | 7.77E-07 |
| Valine, leucine and isoleucine degradation             | 17          | 70                     | 0.24       | 1.08E-06 |
| mRNA surveillance pathway                              | 24          | 149                    | 0.16       | 1.36E-05 |
| Tropane, piperidine and pyridine alkaloid biosynthesis | 6           | 12                     | 0.50       | 7.74E-05 |
| Phenylalanine, tyrosine and tryptophan biosynthesis    | 6           | 12                     | 0.50       | 7.74E-05 |

**Table S14** Top 20 pathway resulted from KEGG. KEGG enrichment of the markable extracted gene family in *P. chinensis* genome.

| Pathway                                  | Gene_<br>number | Backgroud_<br>gene_number | RichFactor | Qvalue   |
|------------------------------------------|-----------------|---------------------------|------------|----------|
| Ascorbate and aldarate metabolism        | 4               | 27                        | 0.15       | 4.46E-05 |
| Pentose and glucuronate interconversions | 4               | 29                        | 0.14       | 4.46E-05 |
| Porphyrin and chlorophyll metabolism     | 4               | 31                        | 0.13       | 4.46E-05 |
| Autophagy - other                        | 2               | 44                        | 0.05       | 5.50E-02 |
| Inositol phosphate metabolism            | 2               | 82                        | 0.02       | 1.34E-01 |
| RNA transport                            | 3               | 201                       | 0.01       | 1.34E-01 |
| Phagosome                                | 2               | 106                       | 0.02       | 1.45E-01 |
| Endocytosis                              | 3               | 240                       | 0.01       | 1.45E-01 |
| Phosphatidylinositol signaling system    | 2               | 118                       | 0.02       | 1.45E-01 |
| mRNA surveillance pathway                | 2               | 149                       | 0.01       | 1.92E-01 |
| RNA degradation                          | 2               | 205                       | 0.01       | 2.82E-01 |
| Biosynthesis of secondary metabolites    | 4               | 576                       | 0.01       | 2.82E-01 |
| Ribosome biogenesis in eukaryotes        | 1               | 106                       | 0.01       | 4.00E-01 |
| Metabolic pathways                       | 6               | 1344                      | 0.00       | 5.35E-01 |

**Table S15** Data for analysis in this study

| <b>Species</b>                  | <b>Data Accession</b>                                                                   | <b>Data Source</b> |
|---------------------------------|-----------------------------------------------------------------------------------------|--------------------|
| <i>Protosalanx chinensis</i> *  | NA                                                                                      | This Study         |
| <i>Protosalanx chinensis</i>    | GCA_010882115.1                                                                         | NCBI               |
|                                 | <a href="https://ftp.cngb.org/pub/gigadb/pub/">https://ftp.cngb.org/pub/gigadb/pub/</a> |                    |
| <i>Protosalanx hyalocranius</i> | 10.5524/100001_101000/100262/                                                           | GigaDB             |
| <i>Anguilla anguilla</i>        | GCF_013347855.1                                                                         | NCBI               |
| <i>Callorhynchus milii</i>      | GCF_018977255.1                                                                         | NCBI               |
| <i>Danio rerio</i>              | GCF_000002035.6                                                                         | NCBI               |
| <i>Esox lucius</i>              | GCF_011004845.1                                                                         | NCBI               |
| <i>Gadus morhua</i>             | GCF_902167405.1                                                                         | NCBI               |
| <i>Hippocampus comes</i>        | GCF_001891065.1                                                                         | NCBI               |
| <i>Hypomesus transpacificus</i> | GCF_021917145.1                                                                         | NCBI               |
| <i>Ictalurus punctatus</i>      | GCF_001660625.2                                                                         | NCBI               |
| <i>Latimeria chalumnae</i>      | GCF_000225785.1                                                                         | NCBI               |
| <i>Lepisosteus oculatus</i>     | GCF_000242695.1                                                                         | NCBI               |
| <i>Oryzias latipes</i>          | GCF_002234675.1                                                                         | NCBI               |
| <i>Oreochromis niloticus</i>    | GCF_001858045.2                                                                         | NCBI               |
| <i>Takifugu rubripes</i>        | GCF_901000725.                                                                          | NCBI               |
| <i>Xiphophorus maculatus</i>    | GCF_002775205.1                                                                         | NCBI               |

Table S16 RNA map ratio

| Sample | Clean read<br>/Mb | q20/% | q30/% | Total mapping<br>Gene ratio/% | Uniquely mapping<br>gene ratio/% | Total mapping<br>genome ratio/% | Uniquely mapping<br>genome ratio/% |
|--------|-------------------|-------|-------|-------------------------------|----------------------------------|---------------------------------|------------------------------------|
| DIC1   | 64.92             | 97.47 | 89.99 | 59.41                         | 46.92                            | 87.63                           | 80.95                              |
| DIC2   | 65.29             | 97.53 | 90.14 | 59.26                         | 46.39                            | 88                              | 81.12                              |
| DIC3   | 65.44             | 97.59 | 90.39 | 62.17                         | 41.49                            | 88.87                           | 76.38                              |
| DIF1   | 64.77             | 97.32 | 89.48 | 61.36                         | 48.35                            | 87.94                           | 81.21                              |
| DIF2   | 62.85             | 97.37 | 89.62 | 62.11                         | 46.51                            | 88.73                           | 80.08                              |
| DIF3   | 64.99             | 97.38 | 89.67 | 61.47                         | 47.45                            | 88.23                           | 80.88                              |
| DOH1   | 63.59             | 97.54 | 90.07 | 66.08                         | 43.07                            | 90.3                            | 78.91                              |
| DOH2   | 65.2              | 97.55 | 90.13 | 60.34                         | 46.64                            | 88.19                           | 80.88                              |
| DOH3   | 66.23             | 97.69 | 90.56 | 66.31                         | 40.69                            | 90.15                           | 76.33                              |
| UOH1   | 63.2              | 97.55 | 90.09 | 59.64                         | 46.75                            | 88.41                           | 81.51                              |
| UOH2   | 65.55             | 97.69 | 90.57 | 61.15                         | 47.79                            | 88.24                           | 81.34                              |
| UOH3   | 62.95             | 97.59 | 90.33 | 60.86                         | 47.45                            | 87.79                           | 80.55                              |
| DHH1   | 63.11             | 97.41 | 89.77 | 63.42                         | 44.04                            | 89.92                           | 79.54                              |
| DHH2   | 62.98             | 97.45 | 89.86 | 59.43                         | 45.42                            | 88.06                           | 79.8                               |
| DHH3   | 62.88             | 97.67 | 90.54 | 60.02                         | 47.52                            | 87.44                           | 80.99                              |

**Table S17** KEGG Pathway enrichment analysis for upward trend DEGs.

| Pathway                                                | Profile7<br>(26) | All-gene<br>(18155) | Pvalue  | Pathway<br>ID | Level 1               | Level 2                                     | KOs           |
|--------------------------------------------------------|------------------|---------------------|---------|---------------|-----------------------|---------------------------------------------|---------------|
| Circadian rhythm                                       | 3                | 56                  | 0.00007 | ko04710       | Organismal<br>Systems | Environmental<br>adaptation                 | K03729+K02295 |
| Glycosaminoglycan<br>biosynthesis -<br>keratan sulfate | 1                | 19                  | 0.02688 | ko00533       | Metabolism            | Glycan<br>biosynthesis<br>and<br>metabolism | K04745        |
| Lysosome                                               | 2                | 185                 | 0.02859 | ko04142       | Cellular<br>Processes | Transport and<br>catabolism                 | K05656+K01369 |
| Phagosome                                              | 2                | 246                 | 0.04802 | ko04145       | Cellular<br>Processes | Transport and<br>catabolism                 | K06461+K07889 |

**Table S18** Pathway enrichment analysis for downward trend DEGs.

| Pathway                               | Profile7<br>(26) | All-gene<br>(18155) | Pvalue  | Pathway<br>ID | Level 1               | Level 2                     | KOs                         |
|---------------------------------------|------------------|---------------------|---------|---------------|-----------------------|-----------------------------|-----------------------------|
| Circadian rhythm<br>- fly             | 3                | 15                  | 0.00002 | ko04711       | Organismal<br>Systems | Environmental<br>adaptation | K02223+K02296               |
| Circadian rhythm                      | 4                | 56                  | 0.00003 | ko04710       | Organismal<br>Systems | Environmental<br>adaptation | K02223+K02296+K08533        |
| Arginine and<br>proline<br>metabolism | 3                | 74                  | 0.00188 | ko00330       | Metabolism            | Amino acid<br>metabolism    | K00286+K01581               |
| Dopaminergic<br>synapse               | 4                | 238                 | 0.00791 | ko04728       | Organismal<br>Systems | Nervous system              | K02223+K02296+K04348        |
| IL-17 signaling<br>pathway            | 3                | 135                 | 0.01010 | ko04657       | Organismal<br>Systems | Immune system               | K09029+K02187+K09487        |
| Oxytocin<br>signaling pathway         | 4                | 395                 | 0.04149 | ko04921       | Organismal<br>Systems | Endocrine<br>system         | K01242+K00907+K06625+K04348 |
